# Supplementary material for: Epidemiological characteristics and determinants of dengue transmission during epidemic and non-epidemic years in Fortaleza, Brazil: 2011-2015
Source: PubMed Central journal article supplement (PMC6292645; doi:10.1371/journal.pntd.0006990), 2018-12-03
Supplement: pntd.0006990.s001.pdf [file pntd.0006990.s001.pdf]

**S1 Table. Bairro and Regional identification numbers in Fortaleza (ordered by regional)**

| <i>Bairro</i>      | <i>ID</i> | <i>Regional</i> |
|--------------------|-----------|-----------------|
| Farias Brito       | 95        | 1               |
| São Gerardo        | 97        | 1               |
| Floresta           | 99        | 1               |
| Jardim Iracema     | 100       | 1               |
| Vila Velha         | 103       | 1               |
| Jardim Guanabara   | 104       | 1               |
| Barra do Ceará     | 105       | 1               |
| Cristo Redentor    | 106       | 1               |
| Álvaro Weyne       | 107       | 1               |
| Vila Ellery        | 108       | 1               |
| Pirambú            | 109       | 1               |
| Carlito Pamplona   | 110       | 1               |
| Monte Castelo      | 111       | 1               |
| Jacarecanga        | 112       | 1               |
| Moura Brasil       | 113       | 1               |
| Luciano Cavalcante | 49        | 2               |
| São João do Tauape | 78        | 2               |
| Salinas            | 80        | 2               |
| Guararapes         | 81        | 2               |
| Cocó               | 82        | 2               |
| Cidade 2000        | 83        | 2               |
| Manuel Dias Branco | 84        | 2               |
| Praia do Futuro II | 85        | 2               |
| Praia do Futuro I  | 86        | 2               |
| De Lourdes         | 87        | 2               |
| Papicu             | 88        | 2               |
| Varjota            | 89        | 2               |
| Aldeota            | 90        | 2               |
| Dionísio Torres    | 91        | 2               |
| Joaquim Távora     | 92        | 2               |
| Centro             | 114       | 2               |
| Praia de Iracema   | 115       | 2               |
| Meireles           | 116       | 2               |
| Mucuripe           | 117       | 2               |
| Cais do Porto      | 118       | 2               |
| Vicente Pinzon     | 119       | 2               |
| Bonsucesso         | 31        | 3               |
| Jóquei Clube       | 59        | 3               |
| João XXIII         | 60        | 3               |
| Henrique Jorge     | 61        | 3               |
| Autran Nunes       | 64        | 3               |
| Dom Lustosa        | 65        | 3               |
| Antônio Bezerra    | 66        | 3               |
| Padre Andrade      | 67        | 3               |
| Pici               | 68        | 3               |
| Bela Vista         | 69        | 3               |
| Parquelândia       | 70        | 3               |
| Amadeu Furtado     | 71        | 3               |
| Rodolfo Teófilo    | 72        | 3               |
| Parque Araxá       | 96        | 3               |
| Presidente Kennedy | 98        | 3               |
| Olavo Oliveira     | 101       | 3               |
| Quintino Cunha     | 102       | 3               |
| Dendê              | 22        | 4               |
| Vila Pery          | 32        | 4               |
| Parangaba          | 33        | 4               |
| Itaperi            | 34        | 4               |
| Serrinha           | 35        | 4               |
| Aeroporto          | 52        | 4               |
| Vila União         | 53        | 4               |
| Montese            | 54        | 4               |

| <i>Bairro</i>            | <i>ID</i> | <i>Regional</i> |
|--------------------------|-----------|-----------------|
| Itaoca                   | 55        | 4               |
| Demócrito Rocha          | 56        | 4               |
| Couto Fernandes          | 57        | 4               |
| Pan Americano            | 58        | 4               |
| Damas                    | 73        | 4               |
| Bom Futuro               | 74        | 4               |
| Parreão                  | 75        | 4               |
| Jardim América           | 76        | 4               |
| Fátima                   | 77        | 4               |
| José Bonifácio           | 93        | 4               |
| Benfica                  | 94        | 4               |
| Siqueira                 | 1         | 5               |
| Canindezinho             | 2         | 5               |
| Parque Presidente Vargas | 3         | 5               |
| Parque Santa Rosa        | 4         | 5               |
| Conjunto Esperança       | 5         | 5               |
| Mondubim                 | 6         | 5               |
| Planalto Ayrton Senna    | 7         | 5               |
| Prefeito José Walter     | 8         | 5               |
| Jardim Cearense          | 23        | 5               |
| Maraponga                | 24        | 5               |
| Manoel Sátiro            | 25        | 5               |
| Parque São José          | 26        | 5               |
| Bom Jardim               | 27        | 5               |
| Granja Lisboa            | 28        | 5               |
| Conjunto Ceará II        | 29        | 5               |
| Granja Portugal          | 30        | 5               |
| Conjunto Ceará I         | 62        | 5               |
| Genibaú                  | 63        | 5               |
| Conjunto Palmeiras       | 9         | 6               |
| Jangurussu               | 10        | 6               |
| Pedras                   | 11        | 6               |
| Ancuri                   | 12        | 6               |
| Paupina                  | 13        | 6               |
| Parque Santa Maria       | 14        | 6               |
| São Bento                | 15        | 6               |
| Coaçu                    | 16        | 6               |
| Guajiru                  | 17        | 6               |
| Messejana                | 18        | 6               |
| Barroso                  | 19        | 6               |
| Passaré                  | 20        | 6               |
| Parque dois Irmãos       | 21        | 6               |
| Dias Macedo              | 36        | 6               |
| Boa Vista                | 37        | 6               |
| Cajazeiras               | 38        | 6               |
| Cidade dos Funcionários  | 39        | 6               |
| Parque Iracema           | 40        | 6               |
| Cambéba                  | 41        | 6               |
| Curió                    | 42        | 6               |
| José de Alencar          | 43        | 6               |
| Lagoa Redona             | 44        | 6               |
| Sabiaguaba               | 45        | 6               |
| Edson Queiroz            | 46        | 6               |
| Sapiranga Coité          | 47        | 6               |
| Parque Manibura          | 48        | 6               |
| Jardim das Oliveiras     | 50        | 6               |
| Aerolândia               | 51        | 6               |
| Alto da Balança          | 79        | 6               |
