# Supplementary material for: Epidemiological characteristics and determinants of dengue transmission during epidemic and non-epidemic years in Fortaleza, Brazil: 2011-2015
Source: PubMed Central journal article supplement (PMC6292645; doi:10.1371/journal.pntd.0006990), 2018-12-03

**S1 Figure. Gap statistic values calculated from parameters used for hierarchical clustering analysis, by year (2011-2015). Range is bounded at seven clusters. Selected number of clusters identified by vertical dotted line.**

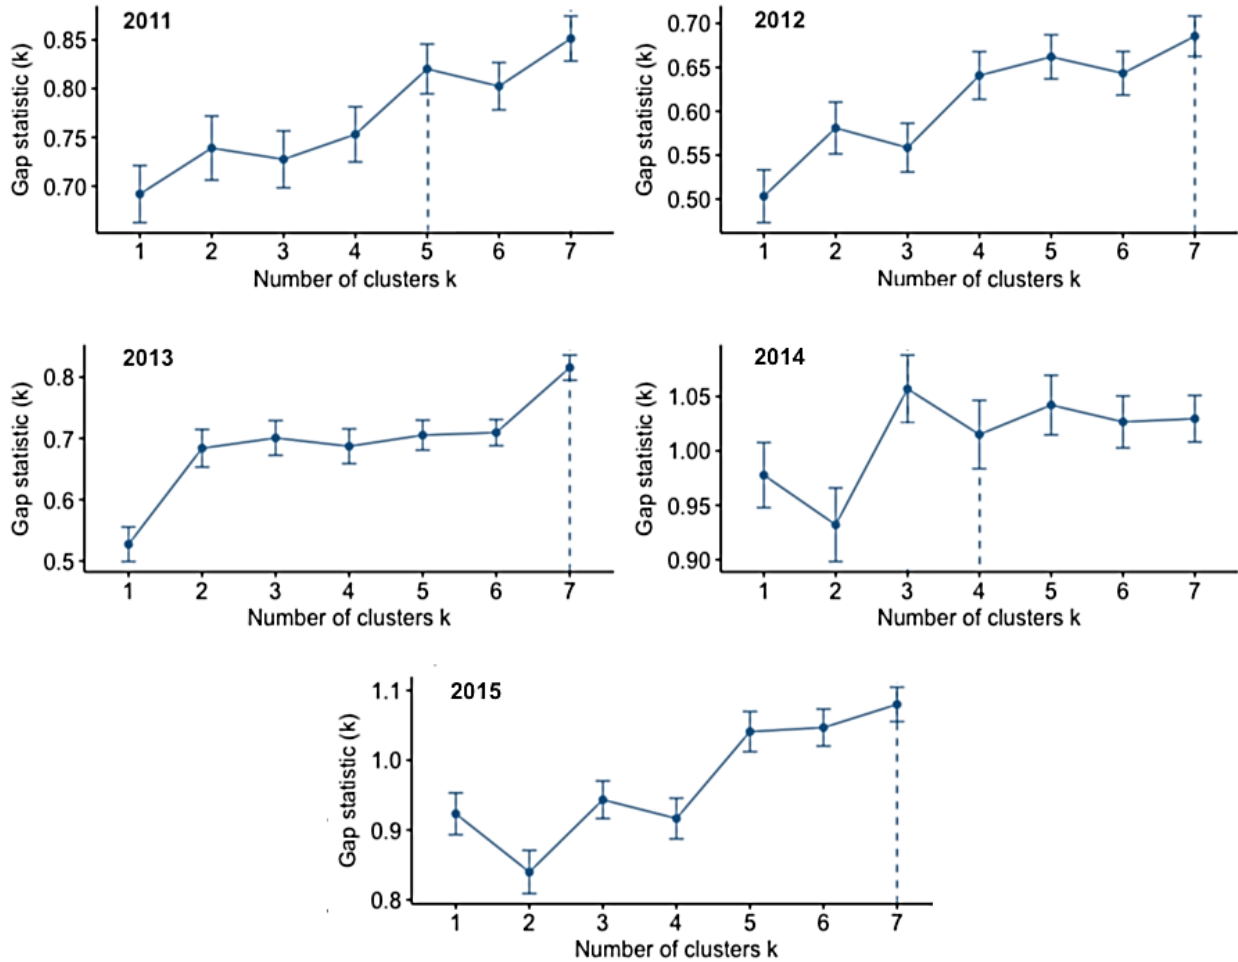

Supplement: pntd.0006990.s004.pdf [file pntd.0006990.s004.pdf]
